# Supplementary material for: Molecular Prevalence, Genetic Diversity, and Tissue Tropism of Bartonella Species in Small Mammals from Yunnan Province, China
Source: MDPI journal article supplement (doi:10.3390/ani14091320), 2024-04-28
Supplement: s1 [file s1]

**Table S1 Identity comparisons of nucleotide sequence of *Bartonella* *ssrA* gene (301 bp) from small mammals in this study**

|       | HQ35  | HQ4   | HQ9   | HQ18  | HQ25  | HQ32  | HQ34  | HQ38  | HQ55  | HQ66  | HQ73  | HQ72  | HQ77  | HQ80  | HQ92  | HQ96  | HQ76  | HQ99  | GS183 | GS97  | GS43  | GS60  | GS164 | GS40  | GS39  | GS29  | GS35  | GS37  | GS55  | GS167 | 1    | 2     | 3     | 4     | 5     | 6     | 7     | 8     | 9     | 10    | 11 | 12 |  |  |  |  |
|-------|-------|-------|-------|-------|-------|-------|-------|-------|-------|-------|-------|-------|-------|-------|-------|-------|-------|-------|-------|-------|-------|-------|-------|-------|-------|-------|-------|-------|-------|-------|------|-------|-------|-------|-------|-------|-------|-------|-------|-------|----|----|--|--|--|--|
| HQ35  | 100.0 |       |       |       |       |       |       |       |       |       |       |       |       |       |       |       |       |       |       |       |       |       |       |       |       |       |       |       |       |       |      |       |       |       |       |       |       |       |       |       |    |    |  |  |  |  |
| HQ4   | 98.9  | 100.0 |       |       |       |       |       |       |       |       |       |       |       |       |       |       |       |       |       |       |       |       |       |       |       |       |       |       |       |       |      |       |       |       |       |       |       |       |       |       |    |    |  |  |  |  |
| HQ9   | 93.1  | 92.1  | 100.0 |       |       |       |       |       |       |       |       |       |       |       |       |       |       |       |       |       |       |       |       |       |       |       |       |       |       |       |      |       |       |       |       |       |       |       |       |       |    |    |  |  |  |  |
| HQ18  | 96.2  | 95.2  | 91.5  | 100.0 |       |       |       |       |       |       |       |       |       |       |       |       |       |       |       |       |       |       |       |       |       |       |       |       |       |       |      |       |       |       |       |       |       |       |       |       |    |    |  |  |  |  |
| HQ25  | 100.0 | 98.9  | 93.1  | 96.2  | 100.0 |       |       |       |       |       |       |       |       |       |       |       |       |       |       |       |       |       |       |       |       |       |       |       |       |       |      |       |       |       |       |       |       |       |       |       |    |    |  |  |  |  |
| HQ32  | 99.5  | 98.4  | 92.6  | 95.7  | 99.5  | 100.0 |       |       |       |       |       |       |       |       |       |       |       |       |       |       |       |       |       |       |       |       |       |       |       |       |      |       |       |       |       |       |       |       |       |       |    |    |  |  |  |  |
| HQ34  | 100.0 | 98.9  | 93.1  | 96.2  | 100.0 | 99.5  | 100.0 |       |       |       |       |       |       |       |       |       |       |       |       |       |       |       |       |       |       |       |       |       |       |       |      |       |       |       |       |       |       |       |       |       |    |    |  |  |  |  |
| HQ38  | 38.2  | 38.2  | 37.1  | 38.2  | 38.2  | 38.2  | 38.2  | 100.0 |       |       |       |       |       |       |       |       |       |       |       |       |       |       |       |       |       |       |       |       |       |       |      |       |       |       |       |       |       |       |       |       |    |    |  |  |  |  |
| HQ55  | 95.2  | 94.1  | 90.5  | 97.9  | 95.2  | 94.6  | 95.2  | 38.2  | 100.0 |       |       |       |       |       |       |       |       |       |       |       |       |       |       |       |       |       |       |       |       |       |      |       |       |       |       |       |       |       |       |       |    |    |  |  |  |  |
| HQ66  | 39.8  | 40.3  | 39.7  | 41.4  | 39.8  | 39.8  | 39.8  | 88.3  | 41.4  | 100.0 |       |       |       |       |       |       |       |       |       |       |       |       |       |       |       |       |       |       |       |       |      |       |       |       |       |       |       |       |       |       |    |    |  |  |  |  |
| HQ73  | 38.2  | 38.2  | 37.1  | 38.2  | 38.2  | 38.2  | 38.2  | 100.0 | 38.2  | 88.3  | 100.0 |       |       |       |       |       |       |       |       |       |       |       |       |       |       |       |       |       |       |       |      |       |       |       |       |       |       |       |       |       |    |    |  |  |  |  |
| HQ72  | 38.2  | 38.2  | 37.1  | 38.2  | 38.2  | 38.2  | 38.2  | 100.0 | 38.2  | 88.3  | 100.0 | 100.0 |       |       |       |       |       |       |       |       |       |       |       |       |       |       |       |       |       |       |      |       |       |       |       |       |       |       |       |       |    |    |  |  |  |  |
| HQ77  | 38.2  | 38.2  | 37.1  | 38.2  | 38.2  | 38.2  | 38.2  | 99.5  | 38.2  | 87.8  | 99.5  | 99.5  | 100.0 |       |       |       |       |       |       |       |       |       |       |       |       |       |       |       |       |       |      |       |       |       |       |       |       |       |       |       |    |    |  |  |  |  |
| HQ80  | 100.0 | 98.9  | 93.1  | 96.2  | 100.0 | 99.5  | 100.0 | 38.2  | 95.2  | 39.8  | 38.2  | 38.2  | 38.2  | 100.0 |       |       |       |       |       |       |       |       |       |       |       |       |       |       |       |       |      |       |       |       |       |       |       |       |       |       |    |    |  |  |  |  |
| HQ92  | 39.8  | 40.3  | 39.7  | 41.4  | 39.8  | 39.8  | 39.8  | 88.8  | 41.4  | 99.5  | 88.8  | 88.8  | 88.3  | 39.8  | 100.0 |       |       |       |       |       |       |       |       |       |       |       |       |       |       |       |      |       |       |       |       |       |       |       |       |       |    |    |  |  |  |  |
| HQ96  | 38.2  | 38.2  | 37.1  | 38.2  | 38.2  | 38.2  | 38.2  | 100.0 | 38.2  | 88.3  | 100.0 | 100.0 | 99.5  | 38.2  | 88.8  | 100.0 |       |       |       |       |       |       |       |       |       |       |       |       |       |       |      |       |       |       |       |       |       |       |       |       |    |    |  |  |  |  |
| HQ76  | 38.2  | 38.2  | 37.1  | 38.2  | 38.2  | 38.2  | 38.2  | 100.0 | 38.2  | 88.3  | 100.0 | 100.0 | 99.5  | 38.2  | 88.8  | 100.0 | 100.0 |       |       |       |       |       |       |       |       |       |       |       |       |       |      |       |       |       |       |       |       |       |       |       |    |    |  |  |  |  |
| HQ99  | 38.2  | 38.2  | 37.1  | 38.2  | 38.2  | 38.2  | 38.2  | 100.0 | 38.2  | 88.3  | 100.0 | 100.0 | 99.5  | 38.2  | 88.8  | 100.0 | 100.0 | 100.0 |       |       |       |       |       |       |       |       |       |       |       |       |      |       |       |       |       |       |       |       |       |       |    |    |  |  |  |  |
| GS183 | 90.9  | 89.8  | 88.4  | 88.2  | 90.9  | 90.3  | 90.9  | 37.7  | 87.6  | 39.8  | 37.7  | 37.7  | 37.7  | 90.9  | 39.8  | 37.7  | 37.7  | 37.7  | 100.0 |       |       |       |       |       |       |       |       |       |       |       |      |       |       |       |       |       |       |       |       |       |    |    |  |  |  |  |
| GS97  | 86.8  | 85.7  | 83.9  | 86.8  | 86.8  | 86.2  | 86.8  | 35.4  | 85.7  | 39.6  | 35.4  | 35.4  | 35.4  | 86.8  | 39.6  | 35.4  | 35.4  | 35.4  | 84.7  | 100.0 |       |       |       |       |       |       |       |       |       |       |      |       |       |       |       |       |       |       |       |       |    |    |  |  |  |  |
| GS43  | 86.8  | 85.7  | 83.9  | 86.8  | 86.8  | 86.2  | 86.8  | 35.4  | 85.7  | 39.6  | 35.4  | 35.4  | 35.4  | 86.8  | 39.6  | 35.4  | 35.4  | 35.4  | 84.7  | 100.0 | 100.0 |       |       |       |       |       |       |       |       |       |      |       |       |       |       |       |       |       |       |       |    |    |  |  |  |  |
| GS60  | 92.5  | 91.4  | 87.8  | 93.0  | 92.5  | 91.9  | 92.5  | 37.6  | 92.5  | 39.2  | 37.6  | 37.6  | 37.6  | 92.5  | 39.2  | 37.6  | 37.6  | 37.6  | 88.2  | 83.6  | 83.6  | 100.0 |       |       |       |       |       |       |       |       |      |       |       |       |       |       |       |       |       |       |    |    |  |  |  |  |
| GS164 | 95.7  | 94.6  | 94.2  | 94.1  | 95.7  | 95.2  | 95.7  | 38.7  | 93.0  | 39.8  | 38.7  | 38.7  | 38.7  | 95.7  | 39.8  | 38.7  | 38.7  | 38.7  | 89.8  | 85.2  | 85.2  | 90.3  | 100.0 |       |       |       |       |       |       |       |      |       |       |       |       |       |       |       |       |       |    |    |  |  |  |  |
| GS40  | 86.8  | 85.7  | 83.9  | 86.8  | 86.8  | 86.2  | 86.8  | 35.4  | 85.7  | 39.6  | 35.4  | 35.4  | 35.4  | 86.8  | 39.6  | 35.4  | 35.4  | 35.4  | 84.7  | 100.0 | 100.0 | 83.6  | 85.2  | 100.0 |       |       |       |       |       |       |      |       |       |       |       |       |       |       |       |       |    |    |  |  |  |  |
| GS39  | 86.8  | 85.7  | 83.9  | 86.8  | 86.8  | 86.2  | 86.8  | 35.4  | 85.7  | 39.6  | 35.4  | 35.4  | 35.4  | 86.8  | 39.6  | 35.4  | 35.4  | 35.4  | 84.7  | 100.0 | 100.0 | 83.6  | 85.2  | 100.0 | 100.0 |       |       |       |       |       |      |       |       |       |       |       |       |       |       |       |    |    |  |  |  |  |
| GS29  | 97.9  | 96.8  | 92.1  | 98.4  | 97.9  | 97.3  | 97.9  | 39.3  | 97.3  | 40.8  | 39.3  | 39.3  | 39.3  | 97.9  | 40.8  | 39.3  | 39.3  | 39.3  | 89.3  | 86.8  | 86.8  | 94.1  | 94.6  | 86.8  | 86.8  | 100.0 |       |       |       |       |      |       |       |       |       |       |       |       |       |       |    |    |  |  |  |  |
| GS35  | 97.9  | 96.8  | 92.1  | 98.4  | 97.9  | 97.3  | 97.9  | 39.3  | 97.3  | 40.8  | 39.3  | 39.3  | 39.3  | 97.9  | 40.8  | 39.3  | 39.3  | 39.3  | 89.3  | 86.8  | 86.8  | 94.1  | 94.6  | 86.8  | 86.8  | 100.0 | 100.0 |       |       |       |      |       |       |       |       |       |       |       |       |       |    |    |  |  |  |  |
| GS37  | 97.9  | 96.8  | 92.1  | 98.4  | 97.9  | 97.3  | 97.9  | 39.3  | 97.3  | 40.8  | 39.3  | 39.3  | 39.3  | 97.9  | 40.8  | 39.3  | 39.3  | 39.3  | 89.3  | 86.8  | 86.8  | 94.1  | 94.6  | 86.8  | 86.8  | 100.0 | 100.0 | 100.0 |       |       |      |       |       |       |       |       |       |       |       |       |    |    |  |  |  |  |
| GS55  | 91.4  | 90.3  | 87.8  | 88.2  | 91.4  | 90.9  | 91.4  | 37.7  | 87.6  | 39.3  | 37.7  | 37.7  | 37.7  | 91.4  | 39.3  | 37.7  | 37.7  | 37.7  | 95.7  | 83.6  | 83.6  | 88.2  | 89.3  | 83.6  | 83.6  | 89.8  | 89.8  | 89.8  | 100.0 |       |      |       |       |       |       |       |       |       |       |       |    |    |  |  |  |  |
| GS167 | 89.3  | 88.2  | 86.8  | 87.1  | 89.3  | 88.7  | 89.3  | 38.2  | 86.6  | 39.8  | 38.2  | 38.2  | 38.2  | 89.3  | 39.8  | 38.2  | 38.2  | 38.2  | 95.2  | 84.1  | 84.1  | 87.6  | 88.2  | 84.1  | 84.1  | 88.7  | 88.7  | 88.7  | 95.2  | 100.0 |      |       |       |       |       |       |       |       |       |       |    |    |  |  |  |  |
| 1     | 37.7  | 37.7  | 36.6  | 37.7  | 37.7  | 37.7  | 37.7  | 99.5  | 37.7  | 88.8  | 99.5  | 99.5  | 98.9  | 37.7  | 89.4  | 99.5  | 99.5  | 99.5  | 99.5  | 37.2  | 34.9  | 34.9  | 37.0  | 38.2  | 34.9  | 34.9  | 38.7  | 38.7  | 38.7  | 37.2  | 37.7 | 100.0 |       |       |       |       |       |       |       |       |    |    |  |  |  |  |
| 2     | 86.8  | 85.7  | 83.9  | 86.2  | 86.8  | 86.2  | 86.8  | 33.9  | 85.2  | 38.0  | 33.9  | 33.9  | 33.9  | 86.8  | 38.0  | 33.9  | 33.9  | 33.9  | 85.2  | 96.8  | 96.8  | 83.6  | 85.2  | 96.8  | 96.8  | 86.2  | 86.2  | 86.2  | 85.2  | 84.7  | 33.3 | 100.0 |       |       |       |       |       |       |       |       |    |    |  |  |  |  |
| 3     | 86.2  | 85.2  | 83.3  | 85.7  | 86.2  | 85.7  | 86.2  | 34.4  | 84.7  | 38.5  | 34.4  | 34.4  | 34.4  | 86.2  | 38.5  | 34.4  | 34.4  | 34.4  | 85.2  | 95.8  | 95.8  | 83.1  | 84.7  | 95.8  | 95.8  | 85.7  | 85.7  | 85.7  | 85.7  | 84.7  | 33.9 | 98.9  | 100.0 |       |       |       |       |       |       |       |    |    |  |  |  |  |
| 4     | 38.7  | 38.7  | 37.6  | 38.7  | 38.7  | 38.7  | 38.7  | 94.7  | 38.7  | 87.2  | 94.7  | 94.7  | 94.2  | 38.7  | 87.8  | 94.7  | 94.7  | 94.7  | 37.7  | 35.4  | 35.4  | 37.6  | 38.2  | 35.4  | 35.4  | 39.8  | 39.8  | 39.8  | 37.7  | 38.2  | 95.2 | 33.9  | 34.4  | 100.0 |       |       |       |       |       |       |    |    |  |  |  |  |
| 5     | 85.6  | 84.6  | 84.8  | 84.0  | 85.6  | 85.1  | 85.6  | 31.9  | 83.0  | 35.6  | 31.9  | 31.9  | 31.9  | 85.6  | 35.6  | 31.9  | 31.9  | 31.9  | 85.1  | 88.4  | 88.4  | 82.5  | 85.1  | 88.4  | 88.4  | 85.1  | 85.1  | 85.1  | 85.6  | 87.2  | 31.4 | 88.9  | 88.4  | 31.9  | 100.0 |       |       |       |       |       |    |    |  |  |  |  |
| 6     | 86.2  | 85.2  | 83.3  | 86.2  | 86.2  | 85.7  | 86.2  | 34.9  | 85.2  | 39.1  | 34.9  | 34.9  | 34.9  | 86.2  | 39.1  | 34.9  | 34.9  | 34.9  | 84.1  | 99.5  | 99.5  | 83.1  | 84.7  | 99.5  | 99.5  | 86.2  | 86.2  | 86.2  | 84.1  | 84.7  | 34.4 | 97.4  | 96.3  | 34.9  | 88.9  | 100.0 |       |       |       |       |    |    |  |  |  |  |
| 7     | 37.2  | 37.2  | 36.1  | 37.2  | 37.2  | 37.2  | 37.2  | 98.4  | 37.2  | 87.8  | 98.4  | 98.4  | 97.9  | 37.2  | 88.3  | 98.4  | 98.4  | 98.4  | 36.7  | 34.4  | 34.4  | 36.5  | 37.7  | 34.4  | 34.4  | 38.2  | 38.2  | 38.2  | 37.7  | 37.2  | 98.9 | 32.8  | 33.3  | 94.2  | 30.9  | 33.9  | 100.0 |       |       |       |    |    |  |  |  |  |
| 8     | 86.7  | 85.6  | 83.8  | 86.2  | 86.7  | 86.2  | 86.7  | 34.6  | 85.1  | 38.7  | 34.6  | 34.6  | 34.6  | 86.7  | 38.7  | 34.6  | 34.6  | 34.6  | 85.1  | 94.7  | 94.7  | 83.0  | 85.1  | 94.7  | 94.7  | 86.2  | 86.2  | 86.2  | 85.1  | 84.6  | 34.0 | 97.9  | 96.8  | 34.6  | 88.8  | 95.2  | 33.5  | 100.0 |       |       |    |    |  |  |  |  |
| 9     | 96.2  | 95.2  | 93.7  | 95.7  | 96.2  | 95.7  | 96.2  | 37.2  | 94.6  | 39.8  | 37.2  | 37.2  | 37.2  | 96.2  | 39.8  | 37.2  | 37.2  | 37.2  | 90.3  | 86.8  | 86.8  | 92.5  | 96.2  | 86.8  | 86.8  | 96.2  | 96.2  | 96.2  | 89.3  | 88.2  | 36.7 | 86.8  | 86.2  | 37.7  | 84.6  | 86.2  | 36.1  | 86.7  | 100.0 |       |    |    |  |  |  |  |
| 10    | 96.2  | 95.2  | 93.7  | 95.7  | 96.2  | 95.7  | 96.2  | 37.7  | 94.6  | 40.3  | 37.7  | 37.7  | 37.7  | 96.2  | 40.3  | 37.7  | 37.7  | 37.7  | 90.3  | 86.2  | 86.2  | 92.5  | 96.2  | 86.2  | 86.2  | 96.2  | 96.2  | 96.2  | 89.3  | 88.2  | 37.2 | 86.2  | 85.7  | 38.2  | 84.6  | 85.7  | 36.1  | 86.2  | 99.5  | 100.0 |    |    |  |  |  |  |
| 11    | 90.9  | 89.8  | 88.4  | 90.9  | 90.3  | 90.9  | 90.9  | 37.2  | 87.6  | 39.3  | 37.2  | 37.2  | 37.2  | 90.9  | 39.3  | 37.2  | 37.2  | 37.2  | 97.3  | 84.1  | 84.1  | 88.2  | 89.8  | 84.1  | 84.1  | 8     |       |       |       |       |      |       |       |       |       |       |       |       |       |       |    |    |  |  |  |  |

**Table S2 Identity comparisons of nucleotide and amino acid sequence of *Bartonella rpoB* gene (866bp) in small mammals in this study**

|       | HQ25 | HQ45 | HQ65 | HQ9  | HQ38 | GS164 | GS109 | GS9  | GS8  | GS2  | 1    | 2    | 3    | 4    | 5    | 6     | 7    | 8    | 9    |
|-------|------|------|------|------|------|-------|-------|------|------|------|------|------|------|------|------|-------|------|------|------|
| HQ25  |      | 90.6 | 89.9 | 99.9 | 86.7 | 97.6  | 91.9  | 99.3 | 88.6 | 91.9 | 96.9 | 89.2 | 84.8 | 87.2 | 82.2 | 100.0 | 97.1 | 85.9 | 89.6 |
| HQ45  | 66.3 |      | 99.8 | 90.0 | 86.6 | 91.1  | 90.9  | 90.4 | 96.2 | 90.7 | 87.4 | 88.2 | 84.9 | 91.9 | 86.5 | 94.9  | 90.2 | 96.0 | 98.3 |
| HQ65  | 64.7 | 96.7 |      | 89.9 | 86.4 | 91.1  | 90.5  | 90.0 | 95.9 | 90.7 | 87.4 | 88.2 | 84.9 | 91.9 | 86.5 | 95.5  | 90.2 | 86.0 | 98.3 |
| HQ9   | 85.1 | 68.6 | 69.5 |      | 86.3 | 97.7  | 91.8  | 99.4 | 88.0 | 92.0 | 97.0 | 89.4 | 84.9 | 87.3 | 82.2 | 99.9  | 97.2 | 86.0 | 89.6 |
| HQ38  | 57.1 | 60.9 | 61.4 | 62.6 |      | 86.9  | 87.0  | 87.1 | 86.2 | 86.9 | 85.4 | 86.9 | 96.4 | 84.2 | 93.7 | 86.7  | 87.7 | 97.6 | 86.6 |
| GS164 | 79.3 | 70.2 | 71.2 | 89.9 | 62.8 |       | 92.0  | 97.6 | 89.2 | 92.1 | 95.9 | 90.5 | 96.4 | 89.1 | 84.1 | 97.6  | 98.3 | 86.8 | 90.4 |
| GS109 | 72.0 | 74.6 | 72.0 | 74.3 | 63.6 | 74.3  |       | 92.1 | 89.7 | 98.1 | 89.2 | 95.8 | 85.0 | 87.8 | 82.8 | 91.9  | 90.8 | 85.7 | 90.4 |
| GS9   | 88.8 | 72.6 | 70.0 | 92.6 | 63.9 | 87.3  | 79.6  |      | 88.3 | 91.9 | 96.9 | 89.2 | 85.4 | 87.0 | 81.9 | 99.3  | 97.0 | 86.4 | 89.3 |
| GS8   | 62.3 | 89.6 | 87.7 | 64.6 | 60.2 | 66.6  | 72.2  | 67.9 |      | 89.5 | 85.6 | 87.1 | 84.3 | 91.0 | 85.6 | 92.0  | 88.1 | 85.5 | 97.5 |
| GS2   | 65.7 | 68.9 | 69.8 | 76.7 | 63.2 | 76.1  | 88.3  | 71.9 | 66.6 |      | 89.6 | 96.9 | 85.1 | 88.0 | 83.1 | 91.9  | 91.3 | 85.9 | 90.5 |
| 1     | 81.5 | 65.2 | 66.1 | 95.1 | 62.9 | 89.0  | 70.9  | 89.3 | 61.9 | 75.6 |      | 91.9 | 85.5 | 87.2 | 84.4 | 96.9  | 97.0 | 96.1 | 88.4 |
| 2     | 63.8 | 67.2 | 68.1 | 74.6 | 63.3 | 75.2  | 87.3  | 69.9 | 65.2 | 95.3 | 77.4 |      | 85.6 | 88.0 | 85.5 | 89.2  | 91.3 | 86.0 | 89.3 |
| 3     | 53.8 | 58.5 | 59.3 | 63.3 | 87.9 | 64.9  | 59.5  | 60.5 | 57.9 | 63.2 | 64.3 | 63.9 |      | 85.4 | 81.0 | 85.4  | 87.1 | 99.7 | 86.5 |
| 4     | 57.1 | 73.9 | 74.9 | 66.8 | 57.4 | 68.8  | 63.9  | 61.9 | 73.2 | 68.2 | 66.4 | 68.2 | 60.7 |      | 94.6 | 92.0  | 88.8 | 85.2 | 93.3 |
| 5     | 53.2 | 68.9 | 69.8 | 61.8 | 55.9 | 64.5  | 59.9  | 57.9 | 68.2 | 64.5 | 63.1 | 65.7 | 57.0 | 93.9 |      | 89.0  | 88.8 | 85.2 | 87.9 |
| 6     | 99.1 | 66.1 | 64.6 | 84.9 | 57.0 | 79.1  | 71.8  | 88.5 | 62.1 | 65.5 | 81.2 | 63.6 | 53.6 | 57.0 | 53.0 |       | 97.1 | 85.9 | 97.1 |
| 7     | 70.8 | 62.5 | 63.4 | 82.7 | 61.5 | 85.5  | 64.6  | 77.3 | 58.9 | 69.5 | 84.3 | 70.8 | 61.4 | 63.9 | 67.6 | 70.6  |      | 87.2 | 90.0 |
| 8     | 49.2 | 53.5 | 54.2 | 57.6 | 82.5 | 59.6  | 53.5  | 55.2 | 53.2 | 57.0 | 59.5 | 58.4 | 90.6 | 55.2 | 58.4 | 49.1  | 67.7 |      | 86.7 |
| 9     | 81.7 | 92.3 | 93.2 | 95.0 | 88.5 | 95.7  | 88.6  | 89.6 | 89.6 | 95.3 | 95.7 | 95.3 | 93.5 | 99.3 | 93.8 | 69.8  | 89.5 | 86.2 |      |

**1: AB529478.1 *Bartonella Koshimizu*; 2: AB529485.1 *Bartonella sp* ;3: LC513659.1 *Bartonella rochalimae* ; 4: AF165992.1 *Bartonella elizabethae* ; 5: MF105889.1 *Bartonella elizabethae* ; 6:AB426694.1 *Bartonella grahamii* ; 7:AY515132.1 *Bartonella phoceensis* ; 8:CP019785.1 *Bartonella sp*; 9:AB426697.1 *Bartonella grahamii***

**Table S3 Identity comparisons of nucleotide and amino acid sequence of *Bartonella gltA* gene (375bp) in small mammals in this study**

|       | GS129 | GS134 | GS136 | HQ64 | HQ19 | 1    | 2    | 3    | 4    | 5     | 5    |
|-------|-------|-------|-------|------|------|------|------|------|------|-------|------|
| GS129 |       | 71.0  | 88.7  | 91.3 | 99.7 | 97.9 | 70.1 | 70.1 | 93.7 | 100.0 | 97.6 |
| GS134 | 43.3  |       | 68.3  | 72.6 | 70.7 | 70.4 | 96.0 | 70.9 | 70.2 | 67.5  | 70.4 |
| GS136 | 69.3  | 40.2  |       | 87.9 | 88.4 | 88.0 | 68.0 | 88.6 | 92.1 | 87.3  | 87.9 |
| HQ64  | 77.2  | 48.0  | 69.3  |      | 91.0 | 90.4 | 72.0 | 97.4 | 90.5 | 90.2  | 90.2 |
| HQ19  | 99.2  | 43.3  | 68.5  | 76.4 |      | 97.6 | 69.8 | 90.7 | 93.4 | 99.7  | 97.4 |
| 1     | 92.1  | 41.7  | 66.1  | 73.2 | 91.3 |      | 69.6 | 89.6 | 93.1 | 97.6  | 99.7 |
| 2     | 40.9  | 89.0  | 36.2  | 44.9 | 40.9 | 41.7 |      | 70.4 | 69.3 | 66.6  | 69.6 |
| 3     | 45.1  | 25.4  | 41.3  | 54.5 | 44.6 | 43.2 | 25.4 |      | 90.7 | 90.5  | 89.7 |
| 4     | 80.3  | 40.9  | 77.2  | 74.8 | 79.5 | 79.5 | 41.7 | 46.5 |      | 92.9  | 92.9 |
| 5     | 89.0  | 33.1  | 58.3  | 66.9 | 88.2 | 83.3 | 32.3 | 40.9 | 70.9 |       | 97.6 |
| 6     | 53.7  | 24.1  | 38.4  | 42.6 | 53.2 | 57.9 | 24.5 | 70.8 | 46.8 | 48.6  |      |

**1:** GU056197.1 *Bartonella phoceensis* ; **2:** EF662053.1 Uncultured *Bartonella* sp ;**3:** KT327033.1 *Bartonella grahamii* ; **4:** DQ884379.1 *Bartonella* sp ; **5:** AB529465.1 *Bartonella Koshimizu* ;**6:** AY515126.1 *Bartonella phoceensis*

**Table S3.** Identity comparisons of nucleotide and amino acid sequence of *Bartonella gltA* gene (375bp) in small mammals from this study.`

**Table S4.** The results of intra-group repeatability.

| Number of<br>copies/(copies/ $\mu$ L) | C <sub>t</sub> values |      |      | Mean C <sub>t</sub> | SD   | CV (%) |
|---------------------------------------|-----------------------|------|------|---------------------|------|--------|
|                                       | 1                     | 2    | 3    |                     |      |        |
| 10 <sup>8</sup>                       | 14.2                  | 14.3 | 14.3 | 14.3                | 0.08 | 0.5    |
| 10 <sup>7</sup>                       | 17.6                  | 17.5 | 17.4 | 17.5                | 0.06 | 0.5    |
| 10 <sup>6</sup>                       | 21.6                  | 22.3 | 21.7 | 21.9                | 0.4  | 1.8    |
| 10 <sup>5</sup>                       | 24.8                  | 25.1 | 25.1 | 25.0                | 0.2  | 0.8    |
| 10 <sup>4</sup>                       | 27.6                  | 27.8 | 28.3 | 27.9                | 0.3  | 1.3    |

C<sub>t</sub>: Cycle Threshold; SD: Standard deviation; CV: Coefficient of variation.

**Table 3.** The results of inter-group repeatability

| Number of<br>copies/(copies/ $\mu$ L) | C <sub>t</sub> values |      |      | Mean C <sub>t</sub> | SD  | CV (%) |
|---------------------------------------|-----------------------|------|------|---------------------|-----|--------|
|                                       | 1                     | 2    | 3    |                     |     |        |
| 10 <sup>8</sup>                       | 14.8                  | 14.3 | 14.3 | 14.5                | 0.2 | 1.8    |
| 10 <sup>7</sup>                       | 19.1                  | 18.7 | 18.8 | 18.8                | 0.1 | 1.0    |
| 10 <sup>6</sup>                       | 22.8                  | 22.5 | 22.3 | 22.5                | 0.2 | 1.1    |
| 10 <sup>5</sup>                       | 25.7                  | 25.1 | 26.1 | 25.6                | 0.4 | 0.8    |
| 10 <sup>4</sup>                       | 29.4                  | 28.3 | 28.8 | 28.9                | 0.5 | 1.9    |

C<sub>t</sub>: Cycle Threshold; SD: Standard deviation; CV: Coefficient of variation.
